# Supplementary material
Source: PubMed Central journal article supplement (PMC10369195)
Supplement: jama-e2311299-s002.pdf [file jama-e2311299-s002.pdf]

## **Data Sharing Statement**

Borah. State Restrictions and Geographic Access to Gender-Affirming Care for Transgender Youth. *JAMA*. Published July 25, 2023. doi:10.1001/jama.2023.11299

### **Data**

**Data available:** No
